# Supplementary material for: Evaluating the Importance of Return to Sports and Hamstring Strength in a Discrete Choice Experiment for Anterior Cruciate Ligament Injury
Source: PubMed Central journal article supplement — Orthop J Sports Med. 2024 Nov 7;12(11):23259671241282657. doi: 10.1177/23259671241282657 (PMC11544754; doi:10.1177/23259671241282657), 2024-11-07
Supplement: sj-pdf-1-ojs-10.1177_23259671241282657.pdf [file sj-pdf-1-ojs-10.1177_23259671241282657.pdf]

**Supplemental Figure S1. Participant Survey**

Name: \_\_\_\_\_

Date of Birth: \_\_\_\_\_

Gender: \_\_\_\_\_

Do you play a sport?

- (a) Yes
- (b) No

Do you currently work?

- (a) Yes, full-time
- (b) Yes, part-time
- (c) No

If so, do you consider your work to be physically demanding?

- (a) Yes
- (b) No

What type of injury/pain prompted today's visit?

- (a) Sport-related injury
- (b) Work-related injury
- (c) Chronic pain
- (d) Other

Marx Activity Score

Please indicate how often you performed each activity in your healthiest and most active state, in the past year.

1. Running: running while playing a sport or jogging
  - a. Less than one time in a month
  - b. One time in a month
  - c. One time in a week
  - d. 2 or 3 times in a week
  - e. 4 or more times in a week
2. Cutting: changing directions while running
  - a. Less than one time in a month
  - b. One time in a month
  - c. One time in a week
  - d. 2 or 3 times in a week
  - e. 4 or more times in a week
3. Decelerating: coming to a quick stop while running
  - a. Less than one time in a month
  - b. One time in a month
  - c. One time in a week
  - d. 2 or 3 times in a week
  - e. 4 or more times in a week
4. Pivoting: turning your body with your foot planted while playing a sport; For example: skiing, skating, kicking, throwing, hitting a ball (golf, tennis, squash), etc.
  - a. Less than one time in a month
  - b. One time in a month
  - c. One time in a week
  - d. 2 or 3 times in a week
  - e. 4 or more times in a week

Based on the following information, if you were to tear a stabilizing ligament of your knee and required surgery to fix it, would you prefer to get surgery A or surgery B?

| <b>Surgery A</b>                                                                                         | <b>Surgery B</b>                                                                                          |
|----------------------------------------------------------------------------------------------------------|-----------------------------------------------------------------------------------------------------------|
| 63% hamstring strength compared to the nonoperated leg 2 years postsurgery                               | 98% hamstring strength compared to the nonoperated leg 2 years postsurgery                                |
| 76% chance of returning to sport within 1 year of surgery                                                | 88% chance of returning to sport within 1 year of surgery                                                 |
| 6% chance that the repair will fail within 2 years and an additional surgery would be required to fix it | 14% chance that the repair will fail within 2 years and an additional surgery would be required to fix it |
| 51% chance of developing knee arthritis in 10 years                                                      | No long-term data available                                                                               |

How important was hamstring strength in your decision-making process?

- (a) Not important at all
- (b) Somewhat important
- (c) Important
- (d) Very Important
- (e) Extremely Important

How would you rate the importance of being able to return to sport in your decision-making process?

- (a) Not important at all
- (b) Somewhat important
- (c) Important
- (d) Very Important
- (e) Extremely Important

How important was the risk of requiring an additional surgery in your decision-making process?

- (a) Not important at all
- (b) Somewhat important
- (c) Important
- (d) Very Important
- (e) Extremely Important

How important was the potential of developing osteoarthritis in your decision-making process?

- (a) Not important at all
- (b) Somewhat important
- (c) Important
- (d) Very Important
- (e) Extremely Important

If given the option, would you choose to undergo the procedure?

(a) Yes

(b) No
